# Supplementary material
Source: ML conference proceedings conference paper supplement (https://proceedings.neurips.cc/paper_files/paper/2018/hash/b19aa25ff58940d974234b48391b9549-Abstract.html)
Supplement: Supplementary file [file b19aa25ff58940d974234b48391b9549-Supplemental.zip]

## Additional Material

**Lemma 2. (Gluing Lemma, [4, 31])** Let  $\pi^{(1)}$  and  $\pi^{(2)}$  be two discrete probability measures in  $\mathbb{R}^d \times \mathbb{R}^d$  such that

$$\sum_{(b_1, \dots, b_d)} \pi^{(1)}(a_1, \dots, a_d; b_1, \dots, b_d) = \sum_{(b_1, \dots, b_d)} \pi^{(2)}(b_1, \dots, b_d; c_1, \dots, c_d)$$

Then there exists a discrete probability measure  $\pi$  on  $\mathbb{R}^d \times \mathbb{R}^d \times \mathbb{R}^d$  such that

$$\sum_{(c_1, \dots, c_d)} \pi(a_1, \dots, a_d; b_1, \dots, b_d; c_1, \dots, c_d) = \pi^{(1)}(a_1, \dots, a_d; b_1, \dots, b_d)$$

and

$$\sum_{(a_1, \dots, a_d)} \pi(a_1, \dots, a_d; b_1, \dots, b_d; c_1, \dots, c_d) = \pi^{(2)}(b_1, \dots, b_d; c_1, \dots, c_d).$$

Let us take  $\mu, \nu$  two probability measures and a ground distance of the form

$$c((a_1, \dots, a_d), (b_1, \dots, b_d)) = \sum_{i=1}^d \Delta_i(a_i, b_i). \quad (15)$$

We can then define

$$R(F_1, \dots, F_d) = \sum_{i=1}^d \left[ \sum_{b_1, \dots, b_{i-1}, a_i, \dots, a_d, b_i} \Delta_i(a_i, b_i) f_{b_1, \dots, b_{i-1}, a_i, \dots, a_d, b_i}^{(i)} \right], \quad (16)$$

where

$$F_i = \{f_{b_1, \dots, b_{i-1}, a_i, \dots, a_d, b_i}^{(i)}\}$$

are a  $N^{d+1}$ -plet of real values satisfying the two congruence conditions

$$\sum_{b_1} f_{a_1, \dots, a_d, b_1}^{(1)} = \mu(a_1, \dots, a_d), \quad (17)$$

$$\sum_{a_N} f_{b_1, \dots, b_{d-1}, a_d, b_d}^{(d)} = \nu(b_1, \dots, b_d) \quad (18)$$

and the following  $d - 1$  connection conditions

$$\sum_{a_i} f_{b_1, \dots, b_{i-1}, a_i, \dots, a_d, b_i}^{(i)} = \sum_{b_{i+1}} f_{b_1, \dots, b_i, a_{i+1}, \dots, a_d, b_{i+1}}^{(i+1)} \quad (19)$$

for  $i = 1, \dots, d - 1$ . We will call the  $d$ -plet of  $(F_1, \dots, F_d)$  a flow chart between  $\mu$  and  $\nu$ .

The set of all possible flow charts between two measures  $\mu$  and  $\nu$  will be indicate with  $\mathcal{F}(\mu, \nu)$ . We will then define

$$\mathcal{R}(\mu, \nu) = \min_{\mathcal{F}(\mu, \nu)} R(F_1, \dots, F_d). \quad (20)$$

**Theorem 3.** Let  $\mu$  and  $\nu$  be two probability measures over the grid  $G = \{1, \dots, N\}^d$ ,  $c : G \times G \rightarrow [0, \infty]$  a separable ground distance, i.e. of the form (??). Then, for each  $\pi$  transport plan between  $\mu$  and  $\nu$  there exists a flow chart  $(F_1, \dots, F_d)$  such that

$$R(F_1, \dots, F_d) = \sum_{G \times G} c(a, b) \pi(a, b). \quad (21)$$

In particular

$$\mathcal{R}(\mu, \nu) = \mathcal{W}_c(\mu, \nu). \quad (22)$$

*Proof.* Let us consider  $\pi$  a transport plan, then we can write

$$\begin{aligned} \sum_{G \times G} c(a, b) \pi(a, b) &= \sum_{a_1, \dots, a_d, b_1, \dots, b_d} \sum_{i=1}^d \Delta_i(a_i, b_i) \pi(a_1, \dots, a_d, b_1, \dots, b_d) = \\ &= \sum_{i=1}^d \sum_{a_1, \dots, a_d, b_1, \dots, b_d} \Delta_i(a_i, b_i) \pi(a_1, \dots, a_d, b_1, \dots, b_d) = \\ &= \sum_{i=1}^d \left[ \sum_{b_1, \dots, b_{i-1}, a_i, \dots, a_d, b_i} \Delta_i(a_i, b_i) f_{b_1, \dots, b_{i-1}, a_i, \dots, a_d, b_i}^{(i)} \right], \end{aligned} \quad (23)$$

where

$$f_{b_1, \dots, b_{i-1}, a_i, \dots, a_d, b_i}^{(i)} = \sum_{a_1, \dots, a_{i-1}, b_{i+1}, \dots, b_d} \pi(a_1, \dots, a_d, b_1, \dots, b_d). \quad (24)$$

To conclude, we have to prove that those  $f_{b_1, \dots, b_{i-1}, a_i, \dots, a_d, b_i}^{(i)}$  satisfy the conditions (??), (??) and (??).

All of those follow from the definition itself, indeed

$$\begin{aligned} \sum_{b_1} f_{a_1, \dots, a_d, b_1}^{(1)} &= \sum_{b_1, \dots, b_d} \pi(a_1, \dots, a_d, b_1, \dots, b_d) = \mu(a_1, \dots, a_d), \\ \sum_{a_d} f_{b_1, \dots, b_{d-1}, a_d, b_d}^{(d)} &= \sum_{a_1, \dots, a_d} \pi(a_1, \dots, a_d, b_1, \dots, b_d) = \nu(b_1, \dots, b_d) \end{aligned}$$

and

$$\begin{aligned} \sum_{a_i} f_{b_1, \dots, b_{i-1}, a_i, \dots, a_d, b_i}^{(i)} &= \sum_{a_1, \dots, a_{i-1}, a_i, b_{i+1}, \dots, b_d} \pi(a_1, \dots, a_d, b_1, \dots, b_d) = \\ &= \sum_{b_{i+1}} \sum_{a_1, \dots, a_i, b_{i+2}, \dots, b_N} \pi(a_1, \dots, a_N, b_1, \dots, b_N) = \sum_{b_{i+1}} f_{b_1, \dots, b_i, a_{i+1}, \dots, a_N, b_{i+1}}^{(i+1)}. \end{aligned}$$

Let now  $(F_1, \dots, F_d)$  be a flow chart. We have that, for each  $i = 1, \dots, d$ , the  $F_i$  define a probability measure over  $\{1, \dots, N\}^{d+1}$ . For  $i = 1$  we easily find that

$$\sum_{a_1, \dots, a_d, b_1} f_{a_1, \dots, a_d, b_1}^{(1)} = \sum_{a_1, \dots, a_d} \sum_{b_1} f_{a_1, \dots, a_d, b_1}^{(1)} = \sum_{a_1, \dots, a_d} \mu(a_1, \dots, a_d) = 1.$$

If we assume that  $F_i$  is a probability measure, then, using condition (??), we get that

$$\begin{aligned} \sum_{b_1, \dots, b_i, a_{i+1}, \dots, a_d, b_{i+1}} f_{b_1, \dots, b_i, a_{i+1}, \dots, a_d, b_{i+1}}^{(i+1)} &= \sum_{b_1, \dots, b_i, a_{i+1}, \dots, a_d} \sum_{b_{i+1}} f_{b_1, \dots, b_i, a_{i+1}, \dots, a_d, b_{i+1}}^{(i+1)} = \\ &= \sum_{b_1, \dots, b_i, a_{i+1}, \dots, a_d} \sum_{a_i} f_{b_1, \dots, b_{i-1}, a_i, \dots, a_d, b_i}^{(i)} = 1. \end{aligned}$$

Thus, by induction, we get that all the  $F_i$  are actually probability measures.

Since we showed that  $f_{a_1, \dots, a_d, b_1}^{(1)}$  and  $f_{b_1, a_2, \dots, a_d, b_2}^{(2)}$  are both probability measures and relation (??) holds we can apply the gluing lemma and find a probability measure  $\pi^{(1)}(a_1, \dots, a_d, b_1, b_2)$  such that

$$\sum_{b_2} \pi^{(1)}(a_1, \dots, a_d, b_1, b_2) = f_{a_1, \dots, a_d, b_1}^{(1)}$$

and

$$\sum_{a_1} \pi^{(1)}(a_1, \dots, a_d, b_1, b_2) = f_{b_1, a_2, \dots, a_d, b_2}^{(2)}.$$

Let us now consider  $f_{b_1, b_2, a_3, \dots, a_d, b_3}^{(3)}$  and  $\pi^{(1)}(a_1, \dots, a_d, b_1, b_2)$ , we have

$$\sum_{a_2} \sum_{a_1} \pi^{(1)}(a_1, \dots, a_d, b_1, b_2) = \sum_{a_2} f_{b_1, a_2, \dots, a_d, b_2}^{(2)} = \sum_{b_3} f_{b_1, b_2, a_3, \dots, a_d, b_3}^{(3)},$$

so we can apply once again the gluing lemma and find a probability measure  $\pi^{(2)}(a_1, \dots, a_d, b_1, b_2, b_3)$  such that

$$\sum_{b_3} \pi^{(2)}(a_1, \dots, a_d, b_1, b_2, b_3) = \pi^{(1)}(a_1, \dots, a_d, b_1, b_2)$$

and

$$\sum_{a_1, a_2} \pi^{(2)}(a_1, \dots, a_d, b_1, b_2, b_3) = f_{b_1, b_2, a_3, \dots, a_d, b_3}^{(3)}.$$

We can iterate this process for  $d - 1$  times and find a probability measure  $\pi_{a_1, \dots, a_d, b_1, \dots, b_d}$  such that

$$\begin{aligned} \sum_{b_1, \dots, b_d} \pi(a_1, \dots, a_d, b_1, \dots, b_d) &= \sum_{b_1, \dots, b_{d-1}} \sum_{b_d} \pi(a_1, \dots, a_d, b_1, \dots, b_d) = \sum_{b_1, \dots, b_{N-1}} \pi^{(N-2)}(a_1, \dots, a_N, b_1, \dots, b_{N-1}) = \\ &\dots = \sum_{b_1} \sum_{b_2} \pi^{(1)}(a_1, \dots, a_N, b_1, b_2) = \sum_{b_1} f^{(1)}(a_1, \dots, a_N, b_1) = \mu(a_1, \dots, a_N). \end{aligned}$$

Similarly, we have

$$\sum_{a_1, \dots, a_d} \pi(a_1, \dots, a_d, b_1, \dots, b_d) = \nu(b_1, \dots, b_d),$$

thus proving that  $\pi$  transports  $\mu$  into  $\nu$ .

For such a  $\pi$ , we now prove that

$$R(F_1, \dots, F_d) = \sum_{a_1, \dots, a_d, b_1, \dots, b_d} \sum_{i=1}^d \Delta_i(a_i, b_i) \pi(a_1, \dots, a_d, b_1, \dots, b_d).$$

We start with

$$\sum_{a_1, \dots, a_d, b_1, \dots, b_d} \sum_{i=1}^d \Delta_i(a_i, b_i) \pi(a_1, \dots, a_d, b_1, \dots, b_d) = \sum_{i=1}^d \sum_{a_1, \dots, a_d, b_1, \dots, b_d} \Delta_i(a_i, b_i) \pi(a_1, \dots, a_d, b_1, \dots, b_d).$$

Let us consider the term

$$\begin{aligned} \sum_{a_1, \dots, a_d, b_1, \dots, b_d} \Delta_i(a_i, b_i) \pi(a_1, \dots, a_d, b_1, \dots, b_d) &= \\ &\sum_{b_1, \dots, b_{i-1}, a_i, \dots, a_d, b_i} \Delta_i(a_i, b_i) \sum_{a_1, \dots, a_{i-1}, b_i, \dots, b_d} \pi(a_1, \dots, a_d, b_1, \dots, b_d) \end{aligned}$$

but, thanks to the Gluing Lemma, we have that

$$\begin{aligned} \sum_{a_1, \dots, a_{i-1}, b_i, \dots, b_d} \pi(a_1, \dots, a_d, b_1, \dots, b_d) &= \sum_{a_1, \dots, a_{i-1}, b_i, \dots, b_{d-1}} \pi^{(d-2)}(a_1, \dots, a_d, b_1, \dots, b_{d-1}) = \dots = \\ &\sum_{a_1, \dots, a_{i-1}} \pi^{(i+1)}(a_1, \dots, a_N, b_1, \dots, b_i) = f_{b_1, \dots, b_{i-1}, a_i, \dots, a_N, b_i}^{(i)}. \end{aligned}$$

So the proof is complete.  $\square$
